# Supplementary material
Source: PubMed Central journal article supplement (PMC5789955)
Supplement: pnas.201718802SI.pdf [file pnas.201718802SI.pdf]

# Supporting Information

Dutta Banik et al. 10.1073/pnas.1718802115

## SI Materials and Methods

**Immunohistochemistry.** Mice were anesthetized with sodium pentobarbital (40 mg/kg; Patterson Veterinary) and then transcardially perfused with a 0.025% heparin solution in 1% sodium nitrite, followed by a 4% paraformaldehyde solution in 0.1 M phosphate buffer (pH 7.2). Following perfusion, the tongues were removed and placed into 4% paraformaldehyde (Electron Microscopy Services) for 2 h, followed by 4 °C overnight cryoprotection in 20% sucrose. On the following day, tongues were frozen in O.C.T. Compound (Sakura Finetek USA, Inc.) and 40- $\mu$ m sections of the CV papillae were cut and washed in PBS (pH 7.4) three times for 10 min each time. Sections were incubated in blocking solution [0.3% Triton X-100, 1% normal goat serum, and 1% BSA in 0.1 M PBS (pH 7.4)] for 2 h at room temperature (RT) and then in primary antibodies for 2 h at RT before an overnight incubation at 4 °C. On the next day, sections were washed three times for 10 min each time and then incubated with an appropriate secondary antibody for 2 h in the dark. The sections were then washed in PBS three times for 10 min each time and mounted onto slides using Fluoromount-G (Southern Biotechnology Associates). Images were obtained with a Zeiss LSM 510 Meta NLO Confocal Microscope and were only adjusted for brightness and contrast.

The following primary antibodies were used: anti-SNAP-25 (1:250, catalog no. 20-783-70323; GenWay Biotech, Inc.; RRID: AB-1024914), anti-TRPM4 (1:50, catalog no. OST00027W; Invitrogen; RRID: AB-1091055), anti-TRPM4 (1:50, catalog no. ab63080; Abcam; RRID: AB-956418), anti-PGP9.5 (1:100, catalog no. ab108986; Abcam; RRID: AB-10891773), anti-NTPDase2 [1:100 (1); RRID: AB-2314986], anti-PLC $\beta$ 2 (1:250, catalog no. SC-206; Santa Cruz Biotechnology; RRID: AB-632197), anti-gustducin (1:100, catalog no. SC-395; Santa Cruz Biotechnology; RRID: AB-10177605), anti-IP $_3$ R3 (1:50, catalog no. 610313; BD Biosciences; RRID: AB-397705), and anti-TRPM5 [1:200 (2)]. Secondary antibodies were purchased from Jackson Immuno-Research and used at a dilution of 1:250. Anti-TRPM4 antibody was validated with the TRPM4-KO and TRPM4/5-DKO mice. Anti-TRPM5 antibody was validated with the TRPM5-KO and TRPM4/5-DKO mice.

ImageJ (NIH) was used to measure the corrected immunofluorescence intensity of TRPM4 and TRPM5, as shown in Fig. S2, and the corrected fluorescence intensity for TRPM5, gustducin, PLC $\beta$ 2, IP $_3$ R3, and TRPM4, as shown in Fig. S3. The area, mean gray value, and immunofluorescence intensity were measured in the area of interest and in five small areas selected as the background signal. The corrected integrated density was calculated as follows:

$$\text{Immunofluorescence intensity} = \frac{\text{Integrated Immunofluorescence intensity} - (\text{Area selected} \times \text{Mean value of background})}{\text{Area selected}}$$

The two-tailed Student's *t* test was done to determine the statistical difference between the immunofluorescence intensity of different mouse lines.

## Live Cell Imaging.

**Na<sup>+</sup> imaging.** All measurements of intracellular Na<sup>+</sup> were performed in isolated taste receptor cells. Briefly, an enzyme solution containing 3 mg Dispase II, 1 mg trypsin inhibitor, and 0.7 mg Collagenase B (Roche Products) per milliliter of Tyrode's solution was injected between the lingual epithelium and the underlying muscles on the tongue. The tongue was incubated in

oxygenated Tyrode's solution for 16 min. After this initial incubation, the lingual epithelium was separated and incubated in Ca<sup>2+</sup>-free Tyrode's solution for 26 min. The taste receptors cells were isolated by manual aspiration and plated on coverslips coated with Celltak (Corning, Inc.). Cells were loaded for 20 min with the Na<sup>+</sup> indicator dye Asante NaTrium-2 (TEFLabs, Inc.) containing the nonionic dispersing agent Pluronic F-127 (Invitrogen, ThermoFisher Scientific) and then washed for 20 min with Tyrode's solution. Taste cells were identified as previously described in previous reports (3–5). Loaded taste cells were visualized using an Olympus IX73 microscope with a 40 $\times$  oil immersion lens, and images were captured using a Hamamatsu ORCA-03G camera. Cells were excited at 488 nm, and images were captured at 540 nm. During experiments, the cells were kept under constant perfusion and images were collected every 1 s using Imaging Workbench (Indec Biosystems). Experiments were graphed and analyzed using Origin 2016 software. All Na<sup>+</sup> imaging data were collected as arbitrary fluorescence units. The taste-evoked Na<sup>+</sup> signals that reached a peak of 5 SD above a stable baseline and were reversible during the following washout period were considered to be responses. A taste cell had to meet two criteria to be used in our analyses. First, after dye loading, the cell had to have a fluorescence value of at least 200; most cells had a fluorescence value between 220 and 240 units. While these values are arbitrary, generally healthy cells take up comparable amounts of dye. A stable baseline was determined by collecting data in the absence of stimulation for at least 50 s. If there was no more than a 2- to 4-unit change in fluorescence during that time period, the cell was used for experiments. Data were normalized to baseline. Peak responses and response magnitudes were averaged and plotted with SEMs. Rise times to the peak responses were also averaged and plotted with SEMs. Data were analyzed for statistically significant differences using either a two-sided Student's *t* test or ANOVA with a Bonferroni's post hoc analysis as appropriate. Taste cell responsiveness was compared using a  $\chi^2$  analysis to determine if there were any significant differences between wild-type, TRPM4-KO, TRPM5-KO, and TRPM4/5-DKO mice. For all analyses, a significance level of *P* < 0.05 was used and SEMs were reported. In all figures, statistical significance is labeled as follows: \**P* < 0.05, \*\**P* < 0.01, and \*\*\**P* < 0.001. Sample numbers varied between experiments due to the variability in the responsiveness of the cells to particular stimuli. Before analysis, data were evaluated for normal distribution using the Shapiro-Wilk test and were determined to be normally distributed at *P* < 0.05.

**Dual Ca<sup>2+</sup> and Na<sup>+</sup> imaging.** Cells were collected according to the procedures described above and were loaded simultaneously with Fura 2-AM (Invitrogen) and Asante NaTrium-2. The cells were excited at 340-, 380-, and 488-nm excitation wavelengths. The dual Ca<sup>2+</sup> and Na<sup>+</sup> images were captured every 4 s using a multiedge dichroic beam-splitter that captures emission at both 510 and 540 nm and Imaging Workbench (Indec Biosystems). Experiments were graphed and analyzed using Origin 2016 software.

## Behavioral Experiments.

**Two-bottle preference test.** Mice from C57BL/6 (wild-type), TRPM5-only, TRPM4-only, and TRPM4/5-DKO lines were subjected to two-bottle preference tests in blind conditions in which each mouse tested was not identified by genotype during the analysis. Each test concentration was presented simultaneously with water for a total of 48 h. Test solutions were switched with water every 24 h to control for side preferences. Preference ratios were calculated as

volume of taste solution intake/total volume intake (taste solution + water). Five male mice from each background were used for a total of 20 mice. Two taste stimuli for each taste quality were tested: sweet [sucrose (10, 50, 100, 300, and 500 mM) and SC45647 (0.001, 0.01, 0.05, and 0.1 mM)], bitter [Den (0.1, 0.5, 1, 5, 10, and 20 mM) and quinine hydrochloride (0.001, 0.01, 0.1, 1, and 5 mM)], and umami [MPG (1, 10, 50, 100, and 300 mM) and inosine monophosphate (0.01, 0.1, 1, 10, and 50 mM)]. Preference ratios between different groups of mice were compared using a repeated-measures two-way ANOVA with a Bonferroni's post hoc analysis and two-sided Student's *t* test to determine significant differences for each concentration. Average values were plotted with the SD for each stimulus concentration. Significance level was set at  $P < 0.05$ .

**Analysis of licking behavior.** We recorded the unconditioned licking responses to varying concentrations of taste stimuli in a test chamber designed to measure brief-access licking (Davis MS80 Rig; Dilog Instruments and Systems). This apparatus consisted of a Plexiglas cage with a wire mesh floor. An opening at the front of the cage allowed access to one of 16 spill-proof glass drinking tubes that reside on a sliding platform. A mechanical shutter opened and closed to allow the mouse access to one of the tubes for a user-specified length of time. A computer controlled the movement of the platform, order of tube presentation, opening and closing of the shutter, duration of tube access, and interval between tube presentations. Each individual lick was detected by a contact lickometer and recorded on a computer via DavisPro collection software (Dilog Instruments and Systems).

Mice were adapted to the test chamber and trained to drink from the sipper tubes for five consecutive days. During training, mice were water-deprived for 20 h. On the first day of training, the mouse was presented with a single stationary bottle of water for 30 min. On the second day, a tube containing water was presented, but the mouse was given 180 s to initiate licking this time, and once licking was recorded, the mouse was given access to the tube for 30 s. At the conclusion of either the 30-s access or the 180-s limit, the shutter was closed again for 10 s. Each of the eight tubes, all containing water, was presented three times. The entire training program took an average of 15 min. During the remaining 3 d of training, the mouse was given 30 min to initiate licking to one of eight tubes of water. Once the mouse began licking, it was given 10 s to lick before the shutter closed for 10 s, after which a new tube was presented.

During testing, animals were allowed to take as many trials as possible in 30 min. Mice were tested on varying concentrations of SC45647 (0, 0.001, 0.01, 0.05, 0.1, and 1 mM), quinine hydrochloride (0, 0.001, 0.01, 0.1, 1, and 5 mM), and MSG (0, 50, 100, 200, 400, and 800 mM) in 10  $\mu$ M amiloride, in that order. Each stimulus was presented in randomized blocks on Monday, Wednesday, and Friday in a single week. Animals were water-deprived for 22 h for all testing except SC45647, when water-replete animals were tested. Once an animal began licking the tube, it was allowed 10 s of access before the shutter closed.

For stimuli tested in the water-deprived condition (MSG and quinine), lick scores were calculated by dividing the average number of licks at each concentration by the average number of licks to water. For stimuli tested while the mice were water-replete (SC45647), lick scores were calculated by subtracting the average number of licks at each concentration by the average number of licks to water. These corrections are used to standardize for individual differences in lick rate and are based on water need (6). Lick scores and licks relative to water were compared by repeated-measures ANOVA with genotype as a between-factor variable and concentration as a repeated-measures within-factor variable. Significant interaction terms were followed by Tukey's honestly significant difference tests. Statistical analyses were performed in Statistica.

**Solutions.** Normal Tyrode's solution consists of the following: 140 mM NaCl, 5 mM KCl, 1 mM MgCl<sub>2</sub>, 3 mM CaCl<sub>2</sub>, 10 mM Hepes, 10 mM glucose, and 1 mM pyruvic acid. Ca<sup>2+</sup>-free Tyrode's solution contained the following: 140 mM NaCl, 5 mM KCl, 10 mM Hepes, 2 mM EGTA, 2 mM 1,2-bis(o-aminophenoxy)ethane-*N,N,N',N'*-tetraacetic acid (BAPTA), 10 mM glucose, and 1 mM pyruvic acid. The low-sodium Tyrode's solution used as the bath solution during dual-imaging experiments with NaCl and citric acid was composed of the following: 30 mM NaCl, 110 mM *N*-methyl-D-glucamine (NMDG), 5 mM KCl, 1 mM MgCl<sub>2</sub>, 3 mM CaCl<sub>2</sub>, 10 mM Hepes, 10 mM glucose, and 1 mM pyruvic acid. The 50 mM KCl and 50 mM citric acid stimuli were dissolved in low-sodium Tyrode's solution with an equimolar substitution of KCl or citric acid for NMDG. NaCl solution was made by completely replacing the NaCl normally found in Tyrode's solution with the indicated concentration of NaCl. The pH of all solutions was adjusted to 7.4 using NaOH or HCl, except for 50 mM citric acid solution, which was adjusted to pH 4.

Normal Tyrode's solution with 1  $\mu$ M U73122 (Tocris Bioscience) and 3  $\mu$ M thapsigargin (Tocris Bioscience) was used to block either PLC or Ca<sup>2+</sup> reuptake via the SERCA pump into Ca<sup>2+</sup> stores. Normal Tyrode's solution with 1  $\mu$ M U73443 (Tocris Bioscience), which is the inactive analog of the PLC blocker U73122, was used to show the specificity of the taste-evoked Na<sup>+</sup> response. The inhibitor 9-phenanthrol (50  $\mu$ M) was used to block TRPM4 channels, and TPPO (50  $\mu$ M) was used to block TRPM5 channels. All blockers and tastants were dissolved in normal Tyrode's solution. The concentrations of the tastants used were as follows: Den (10 mM, catalog no. D5765; Sigma-Aldrich), sucralose (20 mM, catalog no. 69293; Sigma-Aldrich), saccharin (5 mM, catalog no. 109185; Sigma-Aldrich), and MPG (20 mM, catalog no. 49601; Sigma-Aldrich). For the concentration gradient experiments, the following concentrations were used: bitter [Den (0.5, 1, 2.5, 5, 7.5, and 10 mM)], sweet [sucralose (0.1, 0.5, 1, 10, 15, and 20 mM)], and umami [MPG (1, 5, 10, 15, and 20 mM)]. All chemicals were purchased from Sigma-Aldrich unless otherwise noted.

1. Bartel DL, Sullivan SL, Lavoie EG, Sévigny J, Finger TE (2006) Nucleoside triphosphate diphosphohydrolase-2 is the ecto-ATPase of type I cells in taste buds. *J Comp Neurol* 497:1–12.
2. Zhang Z, Zhao Z, Margolskee R, Liman E (2007) The transduction channel TRPM5 is gated by intracellular calcium in taste cells. *J Neurosci* 27:5777–5786.
3. Hacker K, Laskowski A, Feng L, Restrepo D, Medler K (2008) Evidence for two populations of bitter responsive taste cells in mice. *J Neurophysiol* 99:1503–1514.

4. Rebello MR, Maliphol AB, Medler KF (2013) Ryanodine receptors selectively interact with L type calcium channels in mouse taste cells. *PLoS One* 8:e68174.
5. Rebello MR, Medler KF (2010) Ryanodine receptors selectively contribute to the formation of taste-evoked calcium signals in mouse taste cells. *Eur J Neurosci* 32:1825–1835.
6. Mathes CM, Spector AC (2011) The selective serotonin reuptake inhibitor paroxetine does not alter consummatory concentration-dependent licking of prototypical taste stimuli by rats. *Chem Senses* 36:515–526.

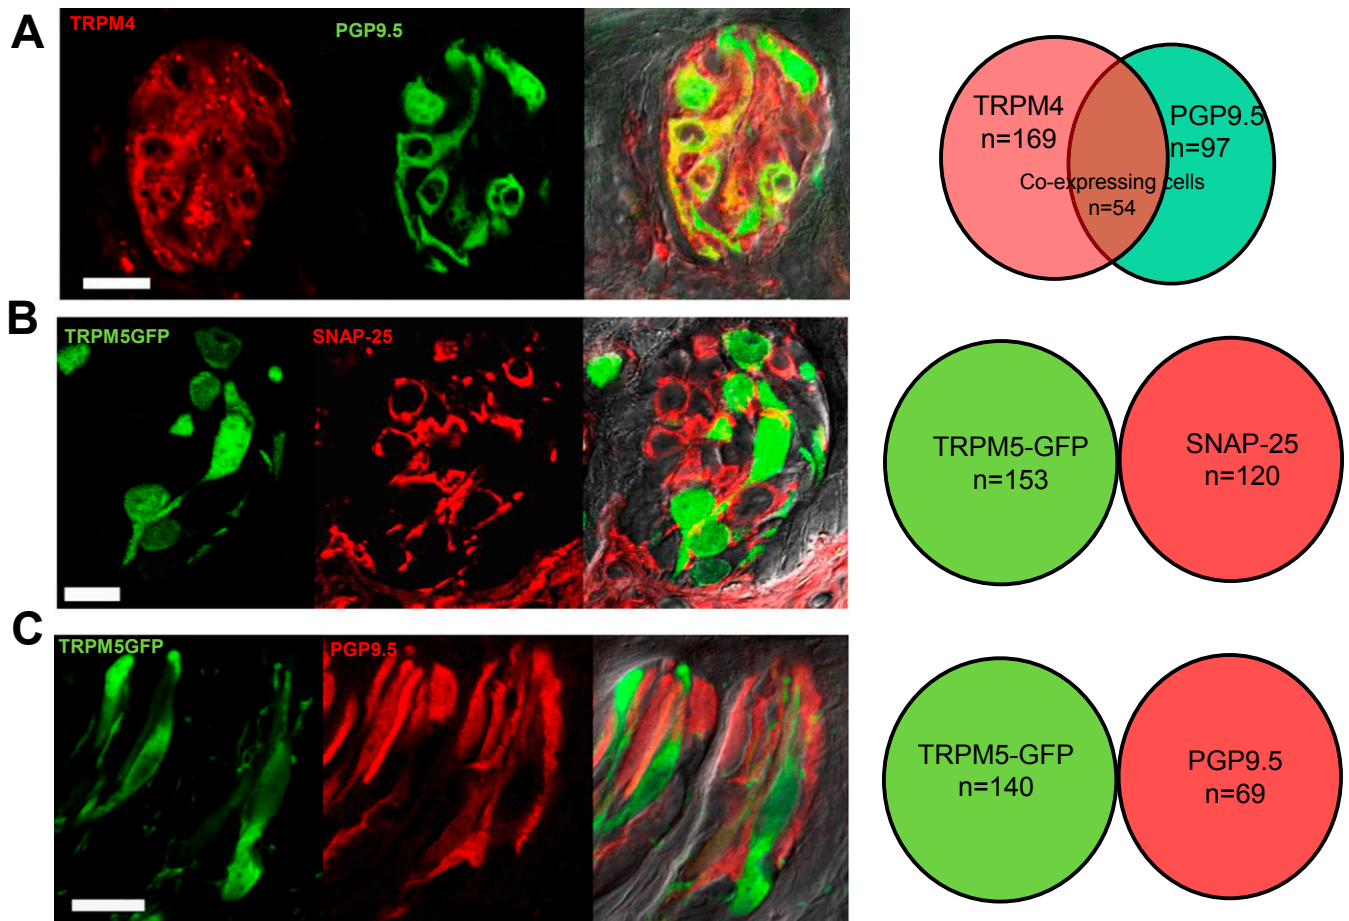

**Fig. S1.** TRPM4 is expressed in type III taste cells, but TRPM5-GFP is not expressed in type III taste cells. (A) Expression of TRPM4 (Left) expression of PGP9.5 (Center), and an overlay with a DIC image (Right) are shown. (Far Right) Corresponding Venn diagram represents the cell count data. Of the 169 TRPM4<sup>+</sup> cells in CV papillae, 54 cells also expressed PGP9.5, indicating an overlap of 32% between TRPM4 and PGP9.5. (B) Expression of TRPM5-GFP (Left), expression of SNAP-25 (Center), and an overlay with a DIC image (Right) are shown ( $n = 153$  TRPM5-GFP cells and 120 SNAP-25<sup>+</sup> cells). (Far Right) Corresponding Venn diagram represents the cell count data. (C) Expression of TRPM5-GFP (Left), expression of PGP9.5 (Center), and an overlay with a DIC image (Right) are shown ( $n = 140$  TRPM5-GFP cells and 69 PGP9.5<sup>+</sup> cells). (Far Right) Corresponding Venn diagram represents the cell count data ( $n = 3$  mice for each). (Scale bar: 20  $\mu\text{m}$ .)





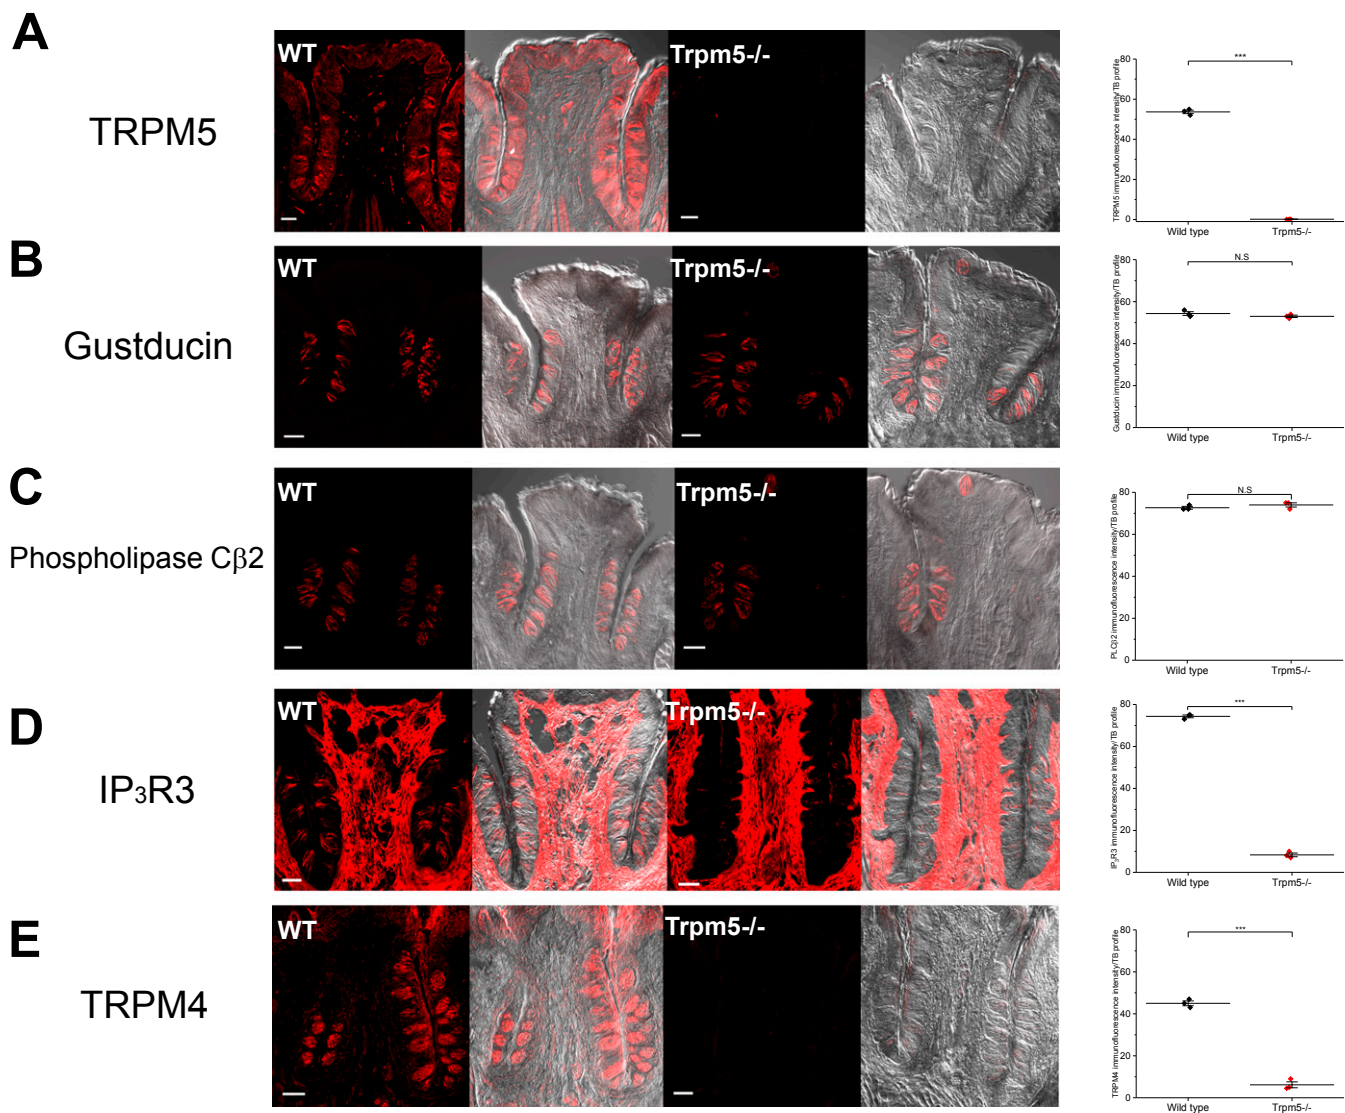

**Fig. S3.** Evaluation of the *Trpm5*<sup>-/-</sup> mouse line used by Zhang et al. (6). Immunohistochemical analyses of the *Trpm5*<sup>-/-</sup> mouse line evaluated the expression of signaling components normally expressed in type II taste cells from the CV papillae compared with C57BL/6 wild-type mice ( $n = 3$  mice for all experiments). (A) TRPM5 expression in wild-type (WT) mice (Left; anti-TRPM5 labeling and overlay with DIC) and *Trpm5*<sup>-/-</sup> mice (Right; anti-TRPM5 labeling and overlay with DIC). (Far Right) ImageJ analysis of fluorescence intensity found no TRPM5 labeling in the *Trpm5*<sup>-/-</sup> mouse compared with WT (\*\*\* $P < 0.001$ ). (B) Gustducin expression in WT mice (Left; anti-gustducin labeling and overlay with DIC) and *Trpm5*<sup>-/-</sup> mice (Right; anti-gustducin labeling and overlay with DIC). (Far Right) ImageJ analysis of fluorescence intensity found no difference in gustducin labeling between the WT and *Trpm5*<sup>-/-</sup> mice. N.S., not significant. (C) PLCβ2 expression in WT mice (Left; anti-PLCβ2 labeling and overlay with DIC) and *Trpm5*<sup>-/-</sup> mice (Right; anti-PLCβ2 labeling and overlay with DIC). (Far Right) ImageJ analysis of fluorescence intensity found no difference in PLCβ2 labeling between the WT and *Trpm5*<sup>-/-</sup> mice. (D) IP<sub>3</sub>R3 expression in WT mice (Left; anti-IP<sub>3</sub>R3 labeling and overlay with DIC) and *Trpm5*<sup>-/-</sup> mice (Right; anti-IP<sub>3</sub>R3 labeling and overlay with DIC). (Far Right) ImageJ analysis of fluorescence intensity found that IP<sub>3</sub>R3 labeling in the *Trpm5*<sup>-/-</sup> CV papillae was only 11% of WT labeling (\*\*\* $P < 0.001$ ). (E) TRPM4 expression in wild-type mice (Left; anti-TRPM4 labeling and overlay with DIC) and *Trpm5*<sup>-/-</sup> mice (Right; anti-TRPM4 labeling and overlay with DIC). (Far Right) ImageJ analysis of fluorescence intensity found that TRPM4 labeling in the *Trpm5*<sup>-/-</sup> CV papillae was only 13% of WT labeling (\*\*\* $P < 0.001$ ). (Scale bars: 20 μm.)
